# Supplementary material for: Biotemplated synthesis of bark-structured TiC nanowires as Pt catalyst supports with enhanced electrocatalytic activity and durability for methanol oxidation
Source: Royal Society of Chemistry journal article supplement (doi:10.1039/c4ta00277f), 2014-01-01
Supplement: c4ta00277f1.pdf [file c4ta00277f1.pdf]

## Electronic Supplementary Information

### Biotemplated synthesis of bark-structured TiC nanowires as Pt catalyst support with enhanced electrocatalytic activity and durability for methanol oxidation

Zhen Qiu, Hui Huang\*, Jun Du, Xinyong Tao, Yang Xia, Tong Feng, Yongping Gan, Wenkui Zhang\*

*College of Chemical Engineering and Materials Science, Zhejiang University of Technology,  
Hangzhou, 310014, P. R. China.*

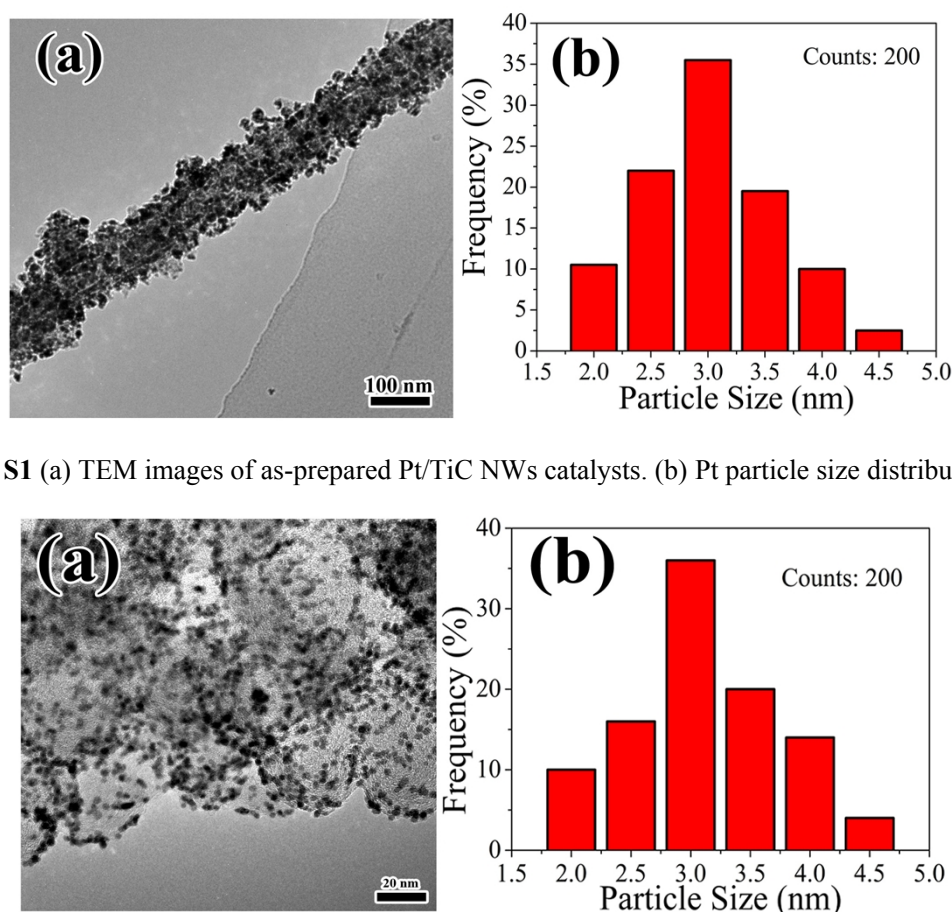

**Fig. S1** (a) TEM images of as-prepared Pt/TiC NWs catalysts. (b) Pt particle size distribution.

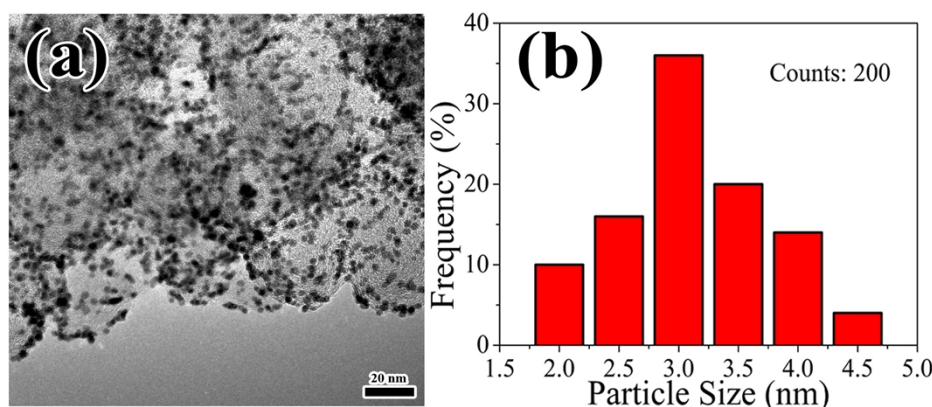

**Fig. S2** (a) TEM image of Pt/C (Vulcan XC-72) catalyst. (b) Pt particle size distribution.

Fig. S2a presents TEM images of Pt/C (Vulcan XC-72) catalyst. From Fig. S2b, they can be clearly seen that platinum (Pt) nanoparticles with average particle size of about 3 nm were highly

dispersed on the surface of Vulcan XC-72 carbon via urea-assisted ethylene glycol reduction method. It obviously indicates that the average size of Pt particle on Vulcan XC-72 carbon is similar to that on TiC NWs (Fig. S1).

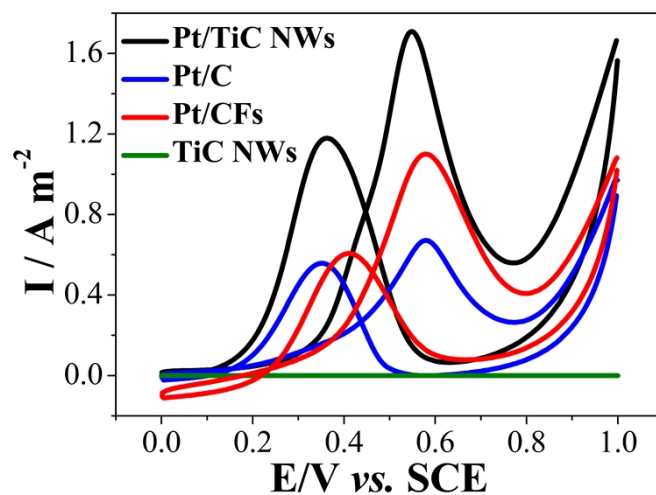

**Fig. S3** CVs of the Pt/TiC NWs, Pt/C and Pt/CFs catalysts in 0.1 M H<sub>2</sub>SO<sub>4</sub> and 1.0 M CH<sub>3</sub>OH at a scan rate of 20 mV s<sup>-1</sup>. Currents were normalized with the ECSA of Pt.

**Table S1** Pt 4f XPS spectra of Pt/TiC NWs, Pt/C and Pt/CFs.

| Catalyst   | Pt 4f <sub>5/2</sub> (ev) | Pt 4f <sub>7/2</sub> (ev) |
|------------|---------------------------|---------------------------|
| Pt/TiC NWs | 71.76                     | 75.08                     |
| Pt/C       | 71.34                     | 74.64                     |
| Pt/CFs     | 71.71                     | 75.07                     |
